# Supplementary material for: Interaction of Nitrate Assimilation and Photorespiration at Elevated CO2
Source: Frontiers journal article supplement (doi:10.3389/fpls.2022.897924), 2022-07-01
Supplement: Image_1.pdf [file Image_1.pdf]

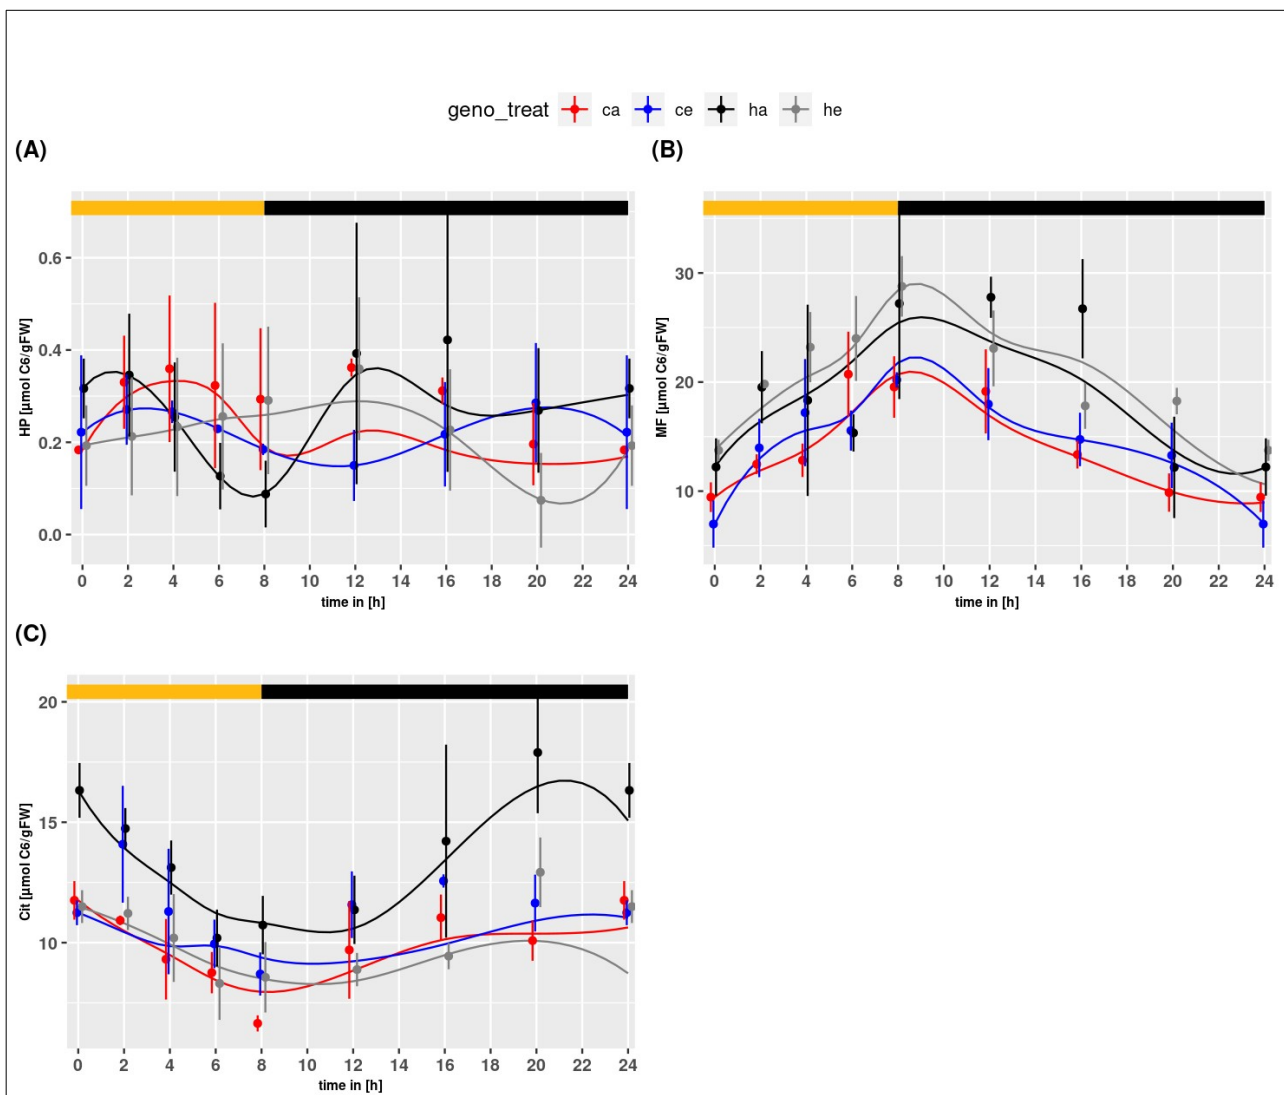

Figure S1: Diurnal course of (a) HP, (b) MF, and Cit (c). In red the wildtype and in blue the *hpr1-1* mutant. Dashed lines and triangles represent elevated  $\text{CO}_2$  concentrations. Continuous lines and closed circles represent ambient  $\text{CO}_2$  concentrations. Dots or triangles represent mean of measured values ( $n = 5$  per group). Bars indicate the error of measurements. Line represent the mean of 20 simulations. Light phase indicated by yellow bar and dark phase indicated by black bar.
