# Supplementary material for: Interaction of Nitrate Assimilation and Photorespiration at Elevated CO2
Source: Frontiers journal article supplement (doi:10.3389/fpls.2022.897924), 2022-07-01

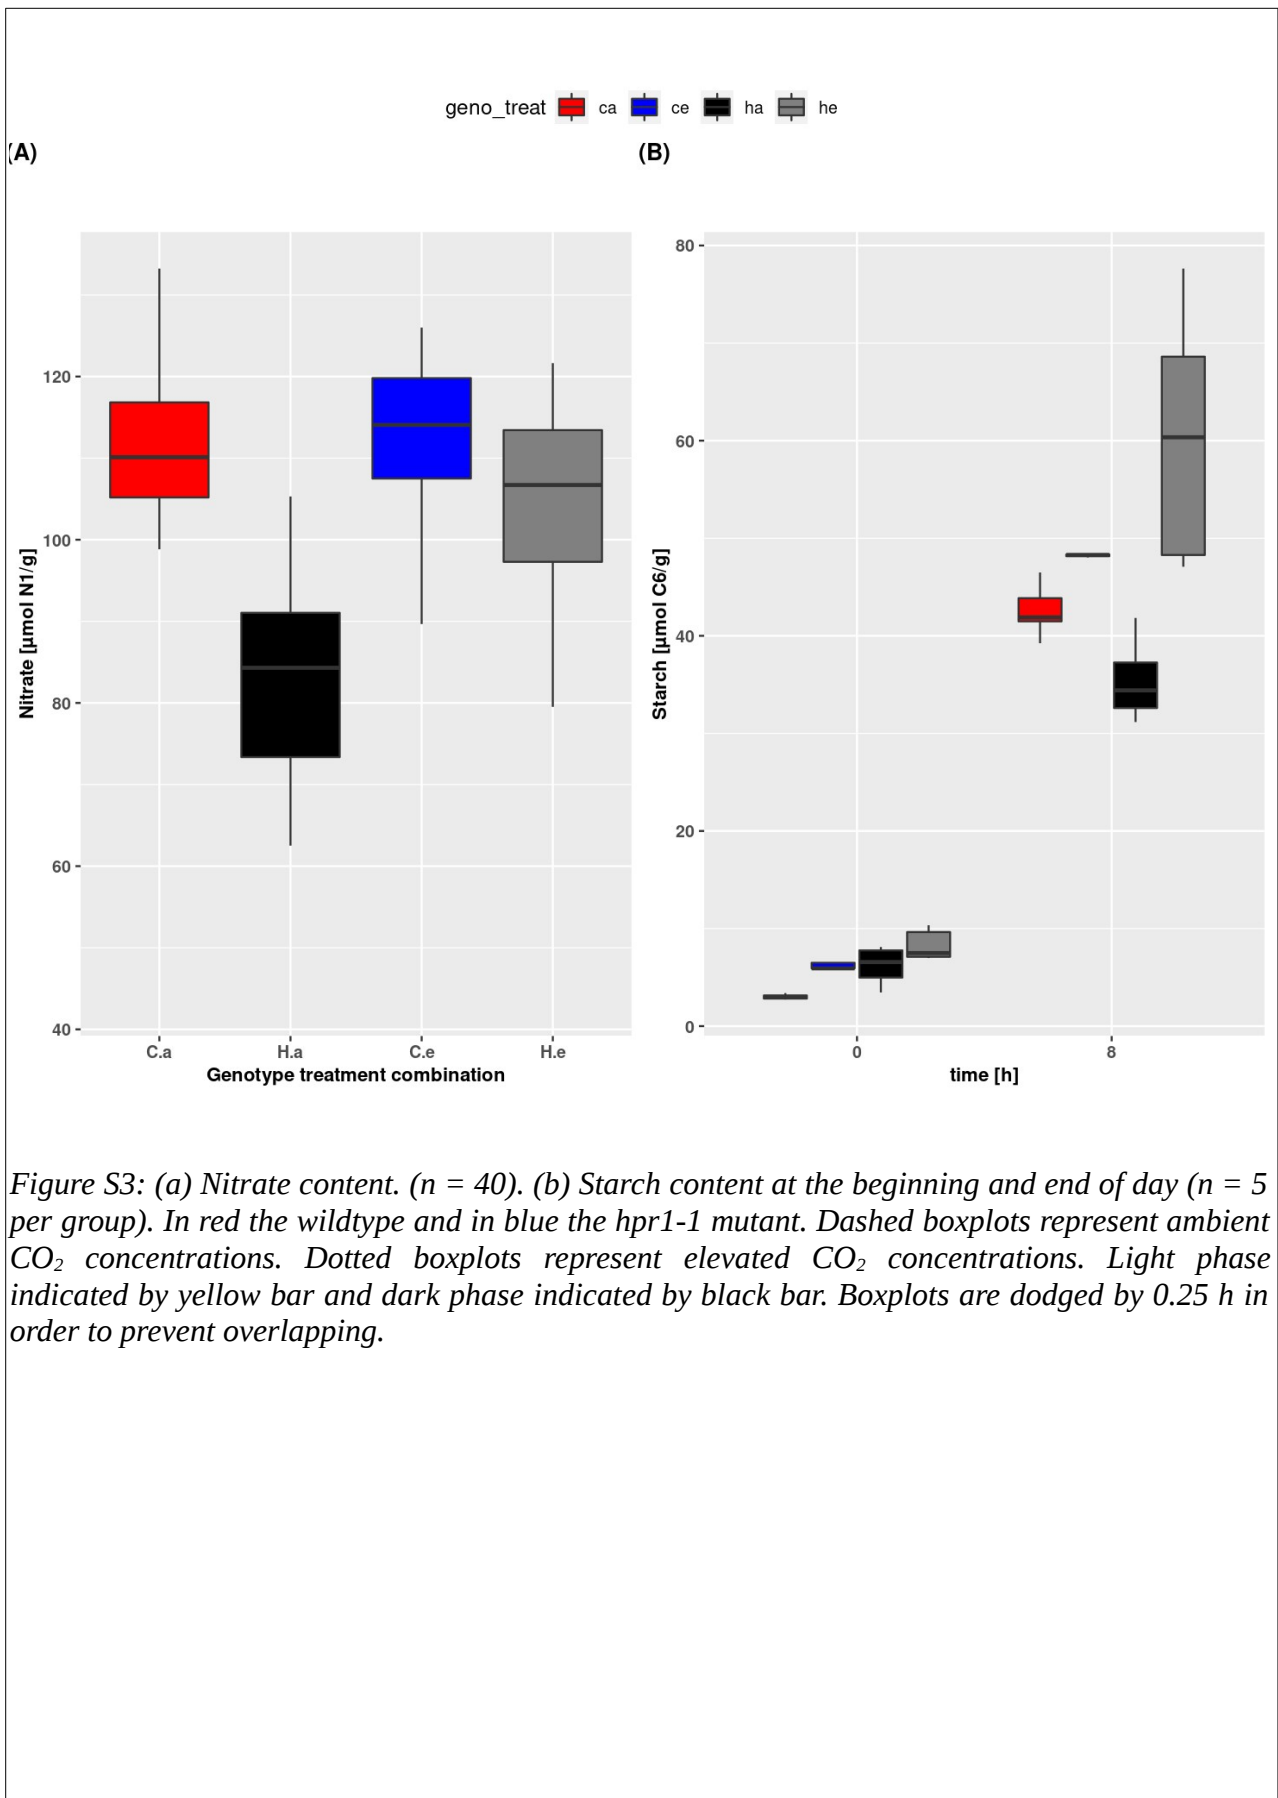

Supplement: Image_3.pdf [file Image_3.pdf]
